# Supplementary material
Source: ML conference proceedings conference paper supplement (https://proceedings.neurips.cc/paper_files/paper/2019/hash/c17028c9b6e0c5deaad29665d582284a-Abstract.html)
Supplement: Supplementary file [file c17028c9b6e0c5deaad29665d582284a-Supplemental.zip]

---

# Supplementary Material

## Local SGD with Periodic Averaging: Tighter Analysis and Adaptive Synchronization

---

**Notation:** In the rest of the appendix, we use the following notation for ease of exposition:

$$\bar{\mathbf{x}}^{(t)} \triangleq \frac{1}{p} \sum_{j=1}^p \mathbf{x}_j^{(t)}, \quad \tilde{\mathbf{g}}^{(t)} \triangleq \frac{1}{p} \sum_{j=1}^p \tilde{\mathbf{g}}_j^{(t)}, \quad \zeta(t) \triangleq \mathbb{E}[F(\bar{\mathbf{x}}^{(t)}) - F^*], \quad t_c \triangleq \lfloor \frac{t}{\tau} \rfloor \tau \quad (13)$$

We also indicate inner product between vectors  $\mathbf{x}$  and  $\mathbf{y}$  with  $\langle \mathbf{x}, \mathbf{y} \rangle$ .

### A Proof of Theorem 1

The proof is based on the Lipschitz continuous gradient assumption, which gives:

$$\mathbb{E}[F(\bar{\mathbf{x}}^{(t+1)}) - F(\bar{\mathbf{x}}^{(t)})] \leq -\eta_t \mathbb{E}[\langle \nabla F(\bar{\mathbf{x}}^{(t)}), \tilde{\mathbf{g}}^{(t)} \rangle] + \frac{\eta_t^2 L}{2} \mathbb{E}[\|\tilde{\mathbf{g}}^{(t)}\|^2] \quad (14)$$

The second term in left hand side of (14) is upper-bounded by the following lemma:

**Lemma 1.** *Under Assumptions 1 and 2, we have the following bound*

$$\mathbb{E}[\|\tilde{\mathbf{g}}^{(t)}\|^2] \leq \left(\frac{C_1}{p} + 1\right) \sum_{j=1}^p \|\nabla F(\mathbf{x}_j^{(t)})\|^2 + \frac{\sigma^2}{pB} \quad (15)$$

The first term in left-hand side of (14) is bounded with following lemma:

**Lemma 2.** *Under Assumptions 3, and according to the Algorithm 1 the expected inner product between stochastic gradient and full batch gradient can be bounded by:*

$$-\eta_t \mathbb{E}[\langle \nabla F(\bar{\mathbf{x}}^{(t)}), \tilde{\mathbf{g}}^{(t)} \rangle] \leq -\frac{\eta_t}{2} \mathbb{E}[\|\nabla F(\bar{\mathbf{x}}^{(t)})\|^2] - \frac{\eta_t}{2} \frac{1}{p} \sum_{j=1}^p \|\nabla F(\mathbf{x}_j^{(t)})\|^2 + \frac{\eta_t L^2}{2p} \mathbb{E} \sum_{j=1}^p \|\bar{\mathbf{x}}^{(t)} - \mathbf{x}_j^{(t)}\|^2 \quad (16)$$

The third term in (16) is bounded as follows:

**Lemma 3.** *Under Assumptions 1 to 2, for  $k\tau + 1 \nmid t$  for some  $k \geq 1$ , we have:*

$$\mathbb{E} \sum_{j=1}^p \|\bar{\mathbf{x}}^{(t)} - \mathbf{x}_j^{(t)}\|^2 \leq 2\left(\frac{p+1}{p}\right) \left( [C_1 + \tau] \sum_{k=t_c+1}^{t-1} \eta_k^2 \sum_{j=1}^p \|\nabla F(\mathbf{x}_j^{(k)})\|^2 + \sum_{k=t_c+1}^{t-1} \frac{\eta_k^2 \sigma^2}{B} \right) \quad (17)$$

Note that first this lemma implies that the term  $\mathbb{E} \sum_{j=1}^p \|\bar{\mathbf{x}}^{(t)} - \mathbf{x}_j^{(t)}\|^2$  only depends on the time  $t_c \triangleq \lfloor \frac{t}{\tau} \rfloor \tau$  through  $t-1$ . Second, it is noteworthy that since  $\bar{\mathbf{x}}^{(t_c+1)} = \mathbf{x}_j^{(t_c+1)}$  for  $1 \leq j \leq p$ , we have  $\mathbb{E} \sum_{j=1}^p \|\bar{\mathbf{x}}^{(t_c+1)} - \mathbf{x}_j^{(t_c+1)}\|^2 = 0$ .

Now using the notation  $\zeta(t) \triangleq \mathbb{E}[F(\bar{\mathbf{x}}^{(t)}) - F^*]$  and by plugging back all the above lemmas into result (14), we get:

$$\zeta^{(t+1)} \leq (1 - \mu\eta_t)\zeta^{(t)} + \frac{L\eta_t^2\sigma^2}{2pB} + \frac{\eta_t L^2}{p} \left( \sum_{k=t_c+1}^{t-1} \eta_k^2 \frac{(p+1)\sigma^2}{pB} \right) + \frac{\eta_t}{2p} \left[ -1 + L\eta_t(C_1 + p) \right] \sum_{j=1}^p \|\nabla F(\mathbf{x}_j^{(t)})\|^2$$

$$\begin{aligned}
& + \frac{\eta_t L^2}{p} \left[ \left( C_1 \left( \frac{p+1}{p} \right) + 2(\tau-1) \right) \sum_{k=t_c+1}^{t-1} \sum_{j=1}^p \eta_k^2 \|\nabla F(\mathbf{x}_j^{(k)})\|^2 \right] \\
& \stackrel{\textcircled{1}}{=} \Delta_t \zeta^{(t)} + A_t + D_t \sum_{j=1}^p \|\nabla F(\mathbf{x}_j^{(t)})\|^2 + B_t \sum_{k=t_c+1}^{t-1} \eta_k^2 \sum_{j=1}^p \|\nabla F(\mathbf{x}_j^{(k)})\|^2,
\end{aligned} \tag{18}$$

where in ① we use the following from the definitions:

$$\Delta_t \triangleq 1 - \mu \eta_t \tag{19}$$

$$A_t \triangleq \frac{\eta_t L \sigma^2}{pB} \left[ \frac{\eta_t}{2} + \frac{L(p+1)}{p} \sum_{k=t_c+1}^{t-1} \eta_k^2 \right] \tag{20}$$

$$D_t \triangleq \frac{\eta_t}{2p} \left[ -1 + L\eta_t(C_1 + p) \right] \tag{21}$$

$$B_t \triangleq \frac{\eta_t L^2(p+1)}{p^2} (C_1 + \tau), \tag{22}$$

In the following lemma, we show that with proper choice of learning rate the negative coefficient of the  $\|\nabla F(\mathbf{x}_j^{(t)})\|_2^2$  can be dominant at each communication time periodically. Thus, we can remove the terms including  $\|\nabla F(\mathbf{x}_j^{(t)})\|_2^2$  from the bound in (18).

Adopting the following notation for  $n \leq m$ :

$$\mathcal{A}_n^{(m)} = [A_n \ A_{n+1} \ \cdots \ A_{m-1} \ A_m] \tag{23}$$

$$\mathcal{B}_n^{(m)} = [B_n \ B_{n+1} \ \cdots \ B_{m-1} \ B_m] \tag{24}$$

$$\Gamma_n^{(m)} = \prod_{i=n}^m \Delta_i \tag{25}$$

$$\mathbf{\Gamma}_n^{(m)} = \begin{bmatrix} \Gamma_n^{(m)} & \Gamma_{n+1}^{(m)} & \cdots & \Gamma_m^{(m)} & 1 \end{bmatrix} \tag{26}$$

with convention that  $\Gamma_m^{(m)} = \Delta_m$ , we have the following lemma:

**Lemma 4.** *We have:*

$$\begin{aligned}
\zeta^{(t+1)} & \leq \Gamma_{t_c+1}^{(t)} \zeta^{(t_c+1)} + \Gamma_{t_c+2}^{(t)} \left[ \frac{L\eta_{t_c+1}^2 \sigma^2}{2pB} \right] + \left\langle \mathcal{A}_{t_c+1}^{(t)}, \mathbf{\Gamma}_{t_c+3}^{(t)} \right\rangle \\
& + \frac{\eta_t}{2p} \left[ -1 + L\eta_t(C_1 + p) \right] d^{(t)} + \frac{\eta_{t-1} \Delta_t}{2p} \left[ -1 + L\eta_{t-1}(C_1 + p) + \frac{2p\eta_{t-1} B_t (\tau-1)}{\Gamma_t^{(t)}} \right] d^{(t-1)} \\
& + \frac{\Gamma_{t-1}^{(t)} \eta_{t-2}}{2p} \left[ -1 + L\eta_{t-2}(C_1 + p) + \frac{2p\eta_{t-2}}{\Gamma_{t-1}^{(t)}} \left\langle \mathbf{\Gamma}_t^{(t)}, \mathcal{B}_{t-1}^{(t)} \right\rangle \right] d^{(t-2)} \\
& + \dots + \frac{\Gamma_{t_c+3}^{(t)} \eta_{t_c+2}}{2p} \left[ -1 + L\eta_{t_c+2}(C_1 + p) + \frac{2p\eta_{t_c+2}}{\Gamma_{t_c+3}^{(t)}} \left\langle \mathbf{\Gamma}_{t_c+4}^{(t)}, \mathcal{B}_{t_c+3}^{(t)} \right\rangle \right] d^{(t_c+2)} \\
& + \frac{\Gamma_{t_c+2}^{(t)} \eta_{t_c+1}}{2p} \left[ -1 + L\eta_{t_c+1}(C_1 + p) + \frac{2p\eta_{t_c+1}}{\Gamma_{t_c+2}^{(t)}} \left\langle \mathbf{\Gamma}_{t_c+3}^{(t)}, \mathcal{B}_{t_c+2}^{(t)} \right\rangle \right] d^{(t_c+1)}
\end{aligned} \tag{27}$$

**Lemma 5.** *Let  $\alpha$  be a positive constant that satisfies  $\frac{\alpha}{e^{\frac{\alpha}{2}}} < \kappa \sqrt{192}$  and  $a = \alpha\tau + 4$ . Suppose that  $\tau$  is sufficiently large to ensure that  $4(a-3)^{\tau-1} L(C_1 + p) \leq \frac{64L^2(p+1)}{\mu p} (\tau-1)\tau(a+1)^{\tau-2}$ , and  $\frac{32L^2}{\mu} C_1(\tau-1)(a+1)^{\tau-2} \leq \frac{64L^2}{\mu} (\tau-1)\tau(a+1)^{\tau-2}$ . If we choose the learning rate as  $\eta_t = \frac{4}{\mu(t+a)}$ , we have:*

$$\zeta^{(t+1)} \leq \Delta_t \zeta^{(t)} + A_t \tag{28}$$

for all  $1 \leq t \leq T$ .

We conclude the proof of Theorem 1 with the following lemma:

**Lemma 6.** For the learning rate as given in Lemma 5, iterating over (28) leads to the following bound:

$$\mathbb{E}[F(\bar{\mathbf{x}}^{(T)}) - F^*] \leq \frac{a^3}{(T+a)^3} \mathbb{E}[F(\bar{\mathbf{x}}^{(0)}) - F^*] + \frac{4\kappa\sigma^2 T(T+2a)}{\mu p B(T+a)^3} + \frac{256\kappa^2\sigma^2 T(\tau-1)}{\mu p B(T+a)^3} \quad (29)$$

## B Proof of lemmas

### B.1 Proof of Lemma 1

The proof follows from the Proof of Lemma 6 in [38] by replacing  $\sigma^2$  with  $\frac{\sigma^2}{B}$ .

### B.2 Proof of Lemma 2

Let  $\tilde{\mathbf{g}}^{(t)} = \frac{1}{p} \sum_{j=1}^p \tilde{\mathbf{g}}_j^{(t)}$ . We have:

$$\mathbb{E} \left[ \left\langle \nabla F(\bar{\mathbf{x}}^{(t)}), \tilde{\mathbf{g}}^{(t)} \right\rangle \right] = \mathbb{E} \left[ \left\langle \nabla F(\bar{\mathbf{x}}^{(t)}), \frac{1}{p} \sum_{j=1}^p \tilde{\mathbf{g}}_j \right\rangle \right] \quad (30)$$

$$= \frac{1}{p} \sum_{j=1}^p \left[ \left\langle \nabla F(\bar{\mathbf{x}}^{(t)}), \mathbb{E}[\tilde{\mathbf{g}}_j] \right\rangle \right] \quad (31)$$

$$\stackrel{\textcircled{1}}{=} \frac{1}{2} \|\nabla F(\bar{\mathbf{x}}^{(t)})\|^2 + \frac{1}{2p} \sum_{j=1}^p \|\nabla F(\mathbf{x}_j^{(t)})\|^2 - \frac{1}{2p} \sum_{j=1}^p \|\nabla F(\bar{\mathbf{x}}^{(t)}) - \nabla F(\mathbf{x}_j^{(t)})\|^2$$

$$\stackrel{\textcircled{2}}{\geq} \mu(F(\bar{\mathbf{x}}^{(t)}) - F^*) + \frac{1}{2p} \sum_{j=1}^p \|\nabla F(\mathbf{x}_j^{(t)})\|^2 - \frac{L^2}{2p} \sum_{j=1}^p \|\bar{\mathbf{x}}^{(t)} - \mathbf{x}_j^{(t)}\|^2, \quad (32)$$

where  $\textcircled{1}$  follows from  $2\langle \mathbf{a}, \mathbf{b} \rangle = \|\mathbf{a}\|^2 + \|\mathbf{b}\|^2 - \|\mathbf{a} - \mathbf{b}\|^2$  and Assumption 1, and  $\textcircled{2}$  comes from Assumption 3.

### B.3 Proof of Lemma 3

Let us set  $t_c \triangleq \lfloor \frac{t}{\tau} \rfloor \tau$ . Therefore, according to Algorithm 1 we have:

$$\bar{\mathbf{x}}^{(t_c+1)} = \frac{1}{p} \sum_{j=1}^p \mathbf{x}_j^{(t_c+1)} \quad (33)$$

for  $1 \leq j \leq p$ . Then, the update rule of Algorithm 1, can be rewritten as:

$$\mathbf{x}_j^{(t)} = \mathbf{x}_j^{(t-1)} - \eta_{t-1} \tilde{\mathbf{g}}_j^{(t-1)} \stackrel{\textcircled{1}}{=} \mathbf{x}_j^{(t-2)} - \left[ \eta_{t-2} \tilde{\mathbf{g}}_j^{(t-2)} + \eta_{t-1} \tilde{\mathbf{g}}_j^{(t-1)} \right] = \bar{\mathbf{x}}^{(t_c+1)} - \left[ \sum_{k=t_c+1}^{t-1} \eta_k \tilde{\mathbf{g}}_j^{(k)} \right], \quad (34)$$

where  $\textcircled{1}$  comes from the update rule of our Algorithm. Now, from (34) we compute the average model as follows:

$$\bar{\mathbf{x}}^{(t)} = \bar{\mathbf{x}}^{(t_c+1)} - \left[ \frac{1}{p} \sum_{j=1}^p \sum_{k=t_c+1}^{t-1} \eta_k \tilde{\mathbf{g}}_j^{(k)} \right] \quad (35)$$

First, without loss of generality, suppose  $t = t_c + r$  where  $r$  denotes the indices of local updates. We note that for  $t_c + 1 < t \leq t_c + \tau$ ,  $\mathbb{E}_t \|\bar{\mathbf{x}}^{(t)} - \mathbf{x}_j^{(t)}\|^2$  does not depend on time  $t \leq t_c$  for  $1 \leq j \leq p$ .

We bound the term  $\mathbb{E} \|\bar{\mathbf{x}}^{(t)} - \mathbf{x}_j^{(t)}\|^2$  for  $t_c + 1 \leq t = t_c + r \leq t_c + \tau$  in three steps: 1) We first relate this quantity to the variance between stochastic gradient and full gradient, 2) We use Assumption 1 on unbiased estimation and i.i.d sampling, 3) We use Assumption 2 to bound the final terms. We proceed to the details each of these three steps.

### Step 1: Relating to variance

$$\begin{aligned}
\mathbb{E}\|\bar{\mathbf{x}}^{(t_c+r)} - \mathbf{x}_l^{(t_c+r)}\|^2 &= \mathbb{E}\|\bar{\mathbf{x}}^{(t_c+1)} - \left[ \sum_{k=t_c+1}^{t-1} \eta_k \tilde{\mathbf{g}}_l^{(k)} \right] - \bar{\mathbf{x}}^{(t_c+1)} + \left[ \frac{1}{p} \sum_{j=1}^p \sum_{k=t_c+1}^{t-1} \eta_k \tilde{\mathbf{g}}_j^{(k)} \right]\|^2 \\
&\stackrel{\textcircled{1}}{=} \mathbb{E}\left\| \sum_{k=1}^r \eta_{t_c+k} \tilde{\mathbf{g}}_l^{(t_c+k)} - \frac{1}{p} \sum_{j=1}^p \sum_{k=1}^r \eta_{t_c+k} \tilde{\mathbf{g}}_j^{(t_c+k)} \right\|^2 \\
&\stackrel{\textcircled{2}}{\leq} 2 \left[ \mathbb{E}\left\| \sum_{k=1}^r \eta_{t_c+k} \tilde{\mathbf{g}}_l^{(t_c+k)} \right\|^2 + \mathbb{E}\left\| \frac{1}{p} \sum_{j=1}^p \sum_{k=1}^r \eta_{t_c+k} \tilde{\mathbf{g}}_j^{(t_c+k)} \right\|^2 \right] \\
&\stackrel{\textcircled{3}}{=} 2 \left[ \mathbb{E}\left\| \sum_{k=1}^r \eta_{t_c+k} \tilde{\mathbf{g}}_l^{(t_c+k)} - \mathbb{E}\left[ \sum_{k=1}^r \eta_{t_c+k} \tilde{\mathbf{g}}_l^{(t_c+k)} \right] \right\|^2 + \left\| \mathbb{E}\left[ \sum_{k=1}^r \eta_{t_c+k} \tilde{\mathbf{g}}_l^{(t_c+k)} \right] \right\|^2 \right. \\
&\quad \left. + \mathbb{E}\left\| \frac{1}{p} \sum_{j=1}^p \sum_{k=1}^r \eta_{t_c+k} \tilde{\mathbf{g}}_j^{(t_c+k)} - \mathbb{E}\left[ \frac{1}{p} \sum_{j=1}^p \sum_{k=1}^r \eta_{t_c+k} \tilde{\mathbf{g}}_j^{(t_c+k)} \right] \right\|^2 + \left\| \mathbb{E}\left[ \frac{1}{p} \sum_{j=1}^p \sum_{k=1}^r \eta_{t_c+k} \tilde{\mathbf{g}}_j^{(t_c+k)} \right] \right\|^2 \right] \\
&\stackrel{\textcircled{4}}{=} 2 \mathbb{E} \left( \left\| \sum_{k=1}^r \eta_{t_c+k} \left[ \tilde{\mathbf{g}}_l^{(t_c+k)} - \mathbf{g}_l^{(t_c+k)} \right] \right\|^2 + \left\| \sum_{k=1}^r \eta_{t_c+k} \mathbf{g}_l^{(t_c+k)} \right\|^2 \right) \\
&\quad + \left\| \frac{1}{p} \sum_{j=1}^p \sum_{k=1}^r \eta_{t_c+k} \left[ \tilde{\mathbf{g}}_j^{(t_c+k)} - \mathbf{g}_j^{(t_c+k)} \right] \right\|^2 + \left\| \frac{1}{p} \sum_{j=1}^p \sum_{k=1}^r \eta_{t_c+k} \mathbf{g}_j^{(t_c+k)} \right\|^2,
\end{aligned} \tag{36}$$

where  $\textcircled{1}$  holds because  $t = t_c + r \leq t_c + \tau$ ,  $\textcircled{2}$  is due to  $\|\mathbf{a} - \mathbf{b}\|^2 \leq 2(\|\mathbf{a}\|^2 + \|\mathbf{b}\|^2)$ ,  $\textcircled{3}$  comes from  $\mathbb{E}[\mathbf{X}^2] = \mathbb{E}[(\mathbf{X} - \mathbb{E}[\mathbf{X}])^2] + \mathbb{E}[\mathbf{X}]^2$ ,  $\textcircled{4}$  comes from unbiased estimation Assumption 1.

### Step 2: Unbiased estimation and i.i.d. sampling

$$\begin{aligned}
&= 2 \mathbb{E} \left( \left\| \sum_{k=1}^r \eta_{t_c+k}^2 \left\| \tilde{\mathbf{g}}_l^{(t_c+k)} - \mathbf{g}_l^{(t_c+k)} \right\|^2 \right. \right. \\
&\quad \left. \left. + \sum_{w \neq z \vee l \neq v} \left\langle \eta_w \tilde{\mathbf{g}}_l^{(w)} - \eta_w \mathbf{g}_l^{(w)}, \eta_z \tilde{\mathbf{g}}_v^{(z)} - \eta_z \mathbf{g}_v^{(z)} \right\rangle + \left\| \sum_{k=1}^r \eta_{t_c+k} \mathbf{g}_l^{(t_c+k)} \right\|^2 \right) \right. \\
&\quad \left. + \frac{1}{p^2} \sum_{l=1}^p \sum_{k=1}^r \eta_{t_c+k}^2 \left\| \tilde{\mathbf{g}}_l^{(t_c+k)} - \mathbf{g}_l^{(t_c+k)} \right\|^2 \right. \\
&\quad \left. + \frac{1}{p^2} \sum_{w \neq z \vee l \neq v} \left\langle \eta_w \tilde{\mathbf{g}}_l^{(w)} - \eta_w \mathbf{g}_l^{(w)}, \eta_z \tilde{\mathbf{g}}_v^{(z)} - \eta_z \mathbf{g}_v^{(z)} \right\rangle + \left\| \frac{1}{p} \sum_{j=1}^p \sum_{k=1}^r \eta_{t_c+k} \mathbf{g}_j^{(t_c+k)} \right\|^2 \right) \\
&\stackrel{\textcircled{5}}{=} 2 \mathbb{E} \left( \left\| \sum_{k=1}^r \eta_{t_c+k}^2 \left\| \tilde{\mathbf{g}}_l^{(t_c+k)} - \mathbf{g}_l^{(t_c+k)} \right\|^2 + \left\| \sum_{k=1}^r \eta_{t_c+k} \mathbf{g}_l^{(t_c+k)} \right\|^2 \right) \right. \\
&\quad \left. + \frac{1}{p^2} \sum_{j=1}^p \sum_{k=1}^r \eta_{t_c+k}^2 \left\| \tilde{\mathbf{g}}_j^{(t_c+k)} - \mathbf{g}_j^{(t_c+k)} \right\|^2 + \left\| \frac{1}{p} \sum_{j=1}^p \sum_{k=1}^r \eta_{t_c+k} \mathbf{g}_j^{(t_c+k)} \right\|^2 \right) \\
&\stackrel{\textcircled{6}}{\leq} 2 \mathbb{E} \left( \left\| \sum_{k=1}^r \eta_{t_c+k}^2 \left\| \tilde{\mathbf{g}}_l^{(t_c+k)} - \mathbf{g}_l^{(t_c+k)} \right\|^2 + r \sum_{k=1}^r \eta_{t_c+k}^2 \left\| \mathbf{g}_l^{(t_c+k)} \right\|^2 \right) \right. \\
&\quad \left. + \frac{1}{p^2} \sum_{j=1}^p \sum_{k=1}^r \left\| \tilde{\mathbf{g}}_j^{(t_c+k)} - \mathbf{g}_j^{(t_c+k)} \right\|^2 + \frac{r}{p^2} \sum_{j=1}^p \sum_{k=1}^r \eta_{t_c+k}^2 \left\| \mathbf{g}_j^{(t_c+k)} \right\|^2 \right) \\
&= 2 \left( \left\| \sum_{k=1}^r \eta_{t_c+k}^2 \mathbb{E} \left\| \tilde{\mathbf{g}}_l^{(t_c+k)} - \mathbf{g}_l^{(t_c+k)} \right\|^2 + r \sum_{k=1}^r \eta_{t_c+k}^2 \mathbb{E} \left\| \mathbf{g}_l^{(t_c+k)} \right\|^2 \right) \right.
\end{aligned}$$

$$+ \frac{1}{p^2} \sum_{j=1}^p \sum_{k=1}^r \eta_{t_c+k}^2 \mathbb{E} \|\mathbf{g}_j^{(t_c+k)} - \mathbf{g}_j^{(t_c+k)}\|^2 + \frac{r}{p^2} \sum_{j=1}^p \sum_{k=1}^r \eta_{t_c+k}^2 \mathbb{E} \|\mathbf{g}_j^{(t_c+k)}\|^2, \quad (37)$$

⑤ is due to independent mini-batch sampling as well as unbiased estimation Assumption. ⑥ follow from inequality  $\|\sum_{i=1}^m \mathbf{a}_i\|^2 \leq m \sum_{i=1}^m \|\mathbf{a}_i\|^2$ .

### Step 3: Using Assumption 2

Next step is to bound the terms in (37) using Assumption 2 as follow:

$$\begin{aligned} \mathbb{E} \|\bar{\mathbf{x}}^{(t)} - \mathbf{x}_l^{(t)}\|^2 &\leq 2 \left( \left[ \sum_{k=1}^r \eta_{t_c+k}^2 \left[ C_1 \|\mathbf{g}_l^{(t_c+k)}\|^2 + \frac{\sigma^2}{B} \right] + r \sum_{k=1}^r \eta_{t_c+k}^2 \|\mathbf{g}_l^{(t_c+k)}\|^2 \right] \right. \\ &\quad \left. + \frac{1}{p^2} \sum_{j=1}^p \sum_{k=1}^r \eta_{t_c+k}^2 \left[ C_1 \|\mathbf{g}_j^{(t_c+k)}\|^2 + \frac{\sigma^2}{B} \right] + \frac{r}{p^2} \sum_{j=1}^p \sum_{k=1}^r \eta_{t_c+k}^2 \|\mathbf{g}_j^{(t_c+k)}\|^2 \right) \\ &= 2 \left( \left[ \sum_{k=1}^r \eta_{t_c+k}^2 C_1 \|\mathbf{g}_l^{(t_c+k)}\|^2 + \sum_{k=1}^r \eta_{t_c+k}^2 \frac{\sigma^2}{B} + r \sum_{k=1}^r \eta_{t_c+k}^2 \|\mathbf{g}_l^{(t_c+k)}\|^2 \right] \right. \\ &\quad \left. + \frac{1}{p^2} \sum_{j=1}^p \sum_{k=1}^r \eta_{t_c+k}^2 C_1 \|\mathbf{g}_j^{(t_c+k)}\|^2 + \sum_{k=1}^r \eta_{t_c+k}^2 \frac{\sigma^2}{p^2 B} + \frac{r}{p^2} \sum_{j=1}^p \sum_{k=1}^r \eta_{t_c+k}^2 \mathbb{E} \|\mathbf{g}_j^{(t_c+k)}\|^2 \right), \end{aligned} \quad (38)$$

Now taking summation over worker indices (38), we obtain:

$$\begin{aligned} \mathbb{E} \sum_{j=1}^p \|\bar{\mathbf{x}}^{(t)} - \mathbf{x}_j^{(t)}\|^2 &\leq 2 \left( \left[ \sum_{l=1}^p \sum_{k=1}^r \eta_{t_c+k}^2 C_1 \|\mathbf{g}_l^{(t_c+k)}\|^2 + \sum_{k=1}^r \eta_{t_c+k}^2 \frac{\sigma^2}{B} + r \sum_{l=1}^p \sum_{k=1}^r \eta_{t_c+k}^2 \|\mathbf{g}_l^{(t_c+k)}\|^2 \right] \right. \\ &\quad \left. + \frac{1}{p} \sum_{j=1}^p \sum_{k=1}^r \eta_{t_c+k}^2 C_1 \|\mathbf{g}_j^{(t_c+k)}\|^2 + \sum_{k=1}^r \eta_{t_c+k}^2 \frac{\sigma^2}{pB} + \frac{r}{p} \sum_{j=1}^p \sum_{k=1}^r \eta_{t_c+k}^2 \|\mathbf{g}_j^{(t_c+k)}\|^2 \right) \\ &= 2 \left( \left[ \left( \frac{p+1}{p} \right) \sum_{j=1}^p \sum_{k=1}^r \eta_{t_c+k}^2 C_1 \|\mathbf{g}_j^{(t_c+k)}\|^2 + \sum_{k=1}^r \eta_{t_c+k}^2 \frac{(p+1)\sigma^2}{pB} \right] \right. \\ &\quad \left. + r \left( \frac{p+1}{p} \right) \sum_{j=1}^p \sum_{k=1}^r \eta_{t_c+k}^2 \|\mathbf{g}_j^{(t_c+k)}\|^2 \right) \\ &= 2 \left( \left[ \left( \frac{p+1}{p} \right) (C_1 + r) \right] \sum_{j=1}^p \sum_{k=1}^r \eta_{t_c+k}^2 \|\mathbf{g}_j^{(t_c+k)}\|^2 + \sum_{k=1}^r \eta_{t_c+k}^2 \frac{(p+1)\sigma^2}{pB} \right) \\ &\leq 2 \left( \left[ \left( \frac{p+1}{p} \right) (C_1 + \tau) \right] \left( \sum_{k=t_c+1}^{t-2} \sum_{j=1}^p \eta_k^2 \|\mathbf{g}_j^{(k)}\|^2 + \sum_{j=1}^p \eta_{t-1}^2 \|\mathbf{g}_j^{(t-1)}\|^2 \right) + \sum_{k=t_c+1}^{t-1} \eta_k^2 \frac{(p+1)\sigma^2}{pB} \right), \end{aligned} \quad (39)$$

which leads to

$$\mathbb{E} \sum_{j=1}^p \|\bar{\mathbf{x}}^{(t)} - \mathbf{x}_j^{(t)}\|^2 \leq 2 \left( \frac{p+1}{p} \right) \left( [C_1 + \tau] \sum_{k=t_c}^{t-1} \eta_k^2 \sum_{j=1}^p \|\nabla F(\mathbf{x}_j^{(k)})\|^2 + \sum_{k=t_c+1}^{t-1} \eta_k^2 \frac{\sigma^2}{B} \right). \quad (40)$$

### B.4 Proof of Lemma 4

The lemma is simply a recursive application of (18). We write out the details below. We use the short hand notation:  $\mathbf{d}^{(t)} \triangleq \sum_{j=1}^p \|\nabla F(\mathbf{x}_j^{(t)})\|^2$ .

$$\zeta(t+1) \leq \zeta(t) - \mu \eta_t \zeta(t) - \frac{\eta_t}{2p} d^{(t)} + \frac{\eta_t L^2}{2p} \sum_{j=1}^p \|\bar{\mathbf{x}}^{(t)} - \mathbf{x}_j^{(t)}\|^2 + \frac{L \eta_t^2}{2p} \left( \frac{C_1 + p}{p} \right) d^{(t)} + \frac{L \eta_t^2 \sigma^2}{2pB}$$

$$\begin{aligned}
&= (1 - \eta_t \mu) \zeta(t) - \frac{\eta_t}{2p} d^{(t)} + \frac{\eta_t L^2}{2p} \sum_{j=1}^p \mathbb{E} \|\bar{\mathbf{x}}^{(t)} - \mathbf{x}_j^{(t)}\|^2 + \frac{L\eta_t^2}{2p} \left( \frac{C_1 + p}{p} \right) d^{(t)} + \frac{L\eta_t^2 \sigma^2}{2pB} \\
&\stackrel{\textcircled{1}}{\leq} (1 - \eta_t \mu) \zeta^{(t)} - \frac{\eta_t}{2p} d^{(t)} + \frac{L\eta_t^2}{2} \left( \frac{C_1 + p}{p} \right) d^{(t)} + \frac{L\eta_t^2 \sigma^2}{2pB} \\
&\quad + \frac{\eta_t L^2 (p+1)}{p^2} \left[ [C_1 + \tau] \sum_{k=t_c+1}^{t-1} \eta_k^2 d^{(k)} + \sum_{k=t_c+1}^{t-1} \eta_k^2 \frac{\sigma^2}{B} \right] \\
&= (1 - \mu \eta_t) \zeta^{(t)} + \frac{L\eta_t^2 \sigma^2}{2pB} + \frac{\eta_t L^2 (p+1) \sigma^2}{p^2 B} \sum_{k=t_c+1}^{t-1} \eta_k^2 + \frac{\eta_t}{2p} \left[ -1 + L\eta_t (C_1 + p) \right] d^{(t)} \\
&\quad + \frac{\eta_t L^2 (p+1)}{p^2} [C_1 + \tau] \sum_{k=t_c+1}^{t-1} \eta_k^2 d^{(k)}, \tag{41}
\end{aligned}$$

where  $\textcircled{1}$  is due to Lemma 3. Using the notation

$$\begin{aligned}
A_t &\triangleq \frac{\eta_t L \sigma^2}{pB} \left[ \frac{\eta_t}{2} + \frac{L(p+1)}{p} \sum_{k=t_c+1}^{t-1} \eta_k^2 \right] \\
B_t &\triangleq \frac{\eta_t L^2 (p+1)}{p^2} [C_1 + \tau]. \tag{42}
\end{aligned}$$

We can rewrite (41) as follows:

$$\zeta^{(t+1)} \leq (1 - \mu \eta_t) \zeta^{(t)} + A_t + \frac{\eta_t}{2p} \left[ -1 + L\eta_t (C_1 + p) \right] d^{(t)} + B_t \sum_{k=t_c+1}^{t-1} \eta_k^2 d^{(k)} \tag{43}$$

Now, using the vector notation in (23) and iterating (43), we obtain the following:

$$\begin{aligned}
\zeta^{(t+1)} &\leq \Gamma_{t_c+1}^{(t)} \zeta^{(t_c+1)} + \Gamma_{t_c+2}^{(t)} \left[ \frac{L\eta_{t_c+1}^2 \sigma^2}{2pB} \right] + \left\langle \mathcal{A}_{t_c+1}^{(t)}, \Gamma_{t_c+3}^{(t)} \right\rangle \\
&\quad + \frac{\eta_t}{2p} \left[ -1 + L\eta_t (C_1 + p) \right] d^{(t)} + \frac{\eta_{t-1} \Delta_t}{2p} \left[ -1 + L\eta_{t-1} (C_1 + p) + \frac{2p\eta_{t-1} B_t (\tau - 1)}{\Gamma_t^{(t)}} \right] d^{(t-1)} \\
&\quad + \frac{\Gamma_{t-1}^{(t)} \eta_{t-2}}{2p} \left[ -1 + L\eta_{t-2} (C_1 + p) + \frac{2p\eta_{t-2}}{\Gamma_{t-1}^{(t)}} \left\langle \Gamma_t^{(t)}, \mathcal{B}_{t-1}^{(t)} \right\rangle \right] d^{(t-2)} \\
&\quad + \dots + \frac{\Gamma_{t_c+3}^{(t)} \eta_{t_c+2}}{2p} \left[ -1 + L\eta_{t_c+2} (C_1 + p) + \frac{2p\eta_{t_c+2}}{\Gamma_{t_c+3}^{(t)}} \left\langle \Gamma_{t_c+4}^{(t)}, \mathcal{B}_{t_c+3}^{(t)} \right\rangle \right] d^{(t_c+2)} \\
&\quad + \frac{\Gamma_{t_c+2}^{(t)} \eta_{t_c+1}}{2p} \left[ -1 + L\eta_{t_c+1} (C_1 + p) + \frac{2p\eta_{t_c+1}}{\Gamma_{t_c+2}^{(t)}} \left\langle \Gamma_{t_c+3}^{(t)}, \mathcal{B}_{t_c+2}^{(t)} \right\rangle \right] d^{(t_c+1)} \tag{44}
\end{aligned}$$

## B.5 Proof of Lemma 5

To show Lemma 5, it suffices to show that for the choice of learning rates stated in the lemma, the coefficients of  $\mathbf{d}^k$  in the statement of Lemma 1, i.e., (27), are all non-positive. So, we aim to show that

$$\begin{aligned}
\eta_t &\leq \frac{1}{L(C_1 + p)} \\
\eta_{t-1} &\leq \frac{1}{L(C_1 + p) + \frac{2pB_t(\tau-1)}{\Gamma_t^{(t)}}} \\
\eta_{t-i} &\leq \frac{1}{L(C_1 + p) + \frac{2p}{\Gamma_{t-i+1}^{(t)}} \left\langle \Gamma_{t-i+2}^{(t)}, \mathcal{B}_{t-i+1}^{(t)} \right\rangle} \tag{45}
\end{aligned}$$

for  $2 \leq i \leq t - t_c - 1$ . Note the following:

- 1)  $\eta_{t_1} > \eta_{t_2}$  if  $t_1 < t_2$ .
- 2)  $\Delta_{t_1} < \Delta_{t_2}$  if  $t_1 < t_2$ .
- 3)  $B_{t_1} > B_{t_2}$  if  $t_1 < t_2$ .

Using these properties, we have:

$$\begin{aligned}
& \frac{1}{L(C_1 + p) + \frac{2p}{\Gamma_{t_c+2}^{(t)}} \langle \mathbf{\Gamma}_{t_c+3}^{(t)}, \mathbf{B}_{t_c+2}^{(t)} \rangle} \\
&= \frac{1}{L(C_1 + p) + \frac{2p}{\prod_{i=t}^{t_c+2} \Delta_i} [\prod_{i=t}^{t_c+3} \Delta_i B_{t_c+2} + \dots + \Delta_t B_{t-1} + B_t]} \\
&\geq \frac{1}{L(C_1 + p) + \frac{2p}{\prod_{i=t}^{t_c+2} \Delta_i} [\prod_{i=t}^{t_c+3} \Delta_i B_1 + \dots + \Delta_t B_1 + B_1]} \\
&\stackrel{\textcircled{6}}{\geq} \frac{1}{L(C_1 + p) + \frac{2p}{\Delta_1^{\tau-1}} B_1 [\tau - 1]}
\end{aligned}$$

$\textcircled{6}$  follows from  $\Delta_i \leq 1, i = 1, 2, \dots, T$ .

Since  $\eta_t$  is decreasing with  $t$ , it suffices to show that  $\eta_1 \geq \frac{1}{L(C_1+p) + \frac{2p}{\Delta_1^{\tau-1}} B_1 [\tau-1]}$ . We show that

for the  $a = \alpha\tau + 4$  where  $\alpha \exp(-\frac{1}{\alpha}) < \kappa \sqrt{192 \left(\frac{p+1}{p}\right)}$  this condition holds. At a high level, note that  $\Delta_1^{\tau-1} = (1 - \frac{4}{1+\alpha\tau+4})^{\tau-1}$  is upper bounded by a  $e^{4/\alpha}$ , that is, as  $\tau$  increases, this expression viewed as a function of  $\tau$  has a finite limit. Given that  $B_1$  is the ratio of two affine terms in  $\tau$ , we are guaranteed that for a sufficiently small  $\alpha$  and for a sufficiently large  $\tau$ , and performing some elementary manipulations, we can ensure that  $\eta_1 = \frac{1}{5+\alpha\tau}$  will be larger than  $\frac{1}{L(C_1+p) + \frac{2p}{\Delta_1^{\tau-1}} B_1 [\tau-1]} = \frac{1}{\Theta(e^{4/\alpha}\tau)}$ . We write out the details below: We aim to show that

$$\begin{aligned}
\eta_1 &= \frac{4}{\mu(1+a)} \\
&\leq \frac{1}{L(C_1 + p) + \frac{2p}{\Delta_1^{\tau-1}} B_1 [\tau - 1]} \\
&= \frac{\Delta_1^{\tau-1}}{\Delta_1^{\tau-1} L(C_1 + p) + 2p B_1 [\tau - 1]} \\
&= \frac{\left(\frac{1+a-4}{a+1}\right)^{\tau-1}}{\left(\frac{1+a-4}{a+1}\right)^{\tau-1} L(C_1 + p) + 2p B_1 [\tau - 1]} \\
&= \frac{\left(\frac{1+a-4}{a+1}\right)^{\tau-1}}{\left(\frac{1+a-4}{a+1}\right)^{\tau-1} L(C_1 + p) + 2p \left(\frac{4L^2 \left(\frac{p+1}{p}\right)(C_1 + \tau)}{\mu p(a+1)}\right)(\tau - 1)} \\
&= \frac{(a-3)^{\tau-1}}{(a-3)^{\tau-1} L(C_1 + p) + \left(\frac{p+1}{p}\right) \frac{8L^2}{\mu} (C_1(\tau-1) + (\tau-1)\tau)(a+1)^{\tau-2}}, \tag{46}
\end{aligned}$$

Simplifying further, we aim to show that

$$\begin{aligned}
& 4(a-3)^{\tau-1} L(C_1 + p) + \frac{32L^2}{\mu} \left(\frac{p+1}{p}\right) (C_1(\tau-1) + \tau(\tau-1))(a+1)^{\tau-2} \\
&\stackrel{\textcircled{1}}{\leq} \frac{192L^2}{\mu^2} \left(\frac{p+1}{p}\right) (\tau-1)\tau(a+1)^{\tau-2} \\
&\leq \mu[(1+a)(a-3)](a-3)^{\tau-2}, \tag{47}
\end{aligned}$$

where ① follows from the fact that  $(a-3)^{\tau-1}L(C_1+p) \leq \frac{16L^2}{\mu}\tau(\tau-1)(a+1)^{\tau-2}$  and  $\frac{32L^2}{\mu}C_1(\frac{p+1}{p})(\tau-1)(a+1)^{\tau-2} \leq (\frac{p+1}{p})\frac{64L^2}{\mu}(\tau-1)^2(a+1)^{\tau-2}$ , and the last inequality above has to be shown for sufficiently large  $\tau$ .

Letting  $a = \alpha\tau + 4$  leads to the following condition:

$$\begin{aligned} \frac{\alpha^2\tau^2 + 6\alpha\tau + 5}{192(\frac{p+1}{p})\frac{L^2}{\mu^2}\tau(\tau-1)} &\leq \left(\frac{a+1}{a-3}\right)^{\tau-2} \\ &= \left(1 + \frac{4}{a-3}\right)^{\tau-2} \\ &= \left(1 + \frac{4}{\alpha\tau + 4 - 3}\right)^{\tau-2} \\ &\stackrel{\textcircled{1}}{\leq} e^{\frac{4}{\alpha}}, \end{aligned} \quad (48)$$

where ① follows from the property that  $\frac{\tau-2}{\alpha\tau+1}$  is non-decreasing with respect to  $\tau$ . From (48) we get our condition over  $\alpha$  as follows:

$$\left(\left(\frac{p+1}{p}\right)192\kappa^2e^{\frac{4}{\alpha}} - \alpha^2\right)\tau^2 - \left(\left(\frac{p+1}{p}\right)192\kappa^2e^{\frac{4}{\alpha}} + 6\alpha\right)\tau - 5 \geq 0 \quad (49)$$

. Note that the above is satisfied so long as  $\frac{\alpha}{e^{\frac{4}{\alpha}}} \leq \kappa\sqrt{192(\frac{p+1}{p})}$  and

$$\tau \geq \frac{\left(\left(\frac{p+1}{p}\right)192\kappa^2e^{\frac{4}{\alpha}} + 6\alpha\right) + \sqrt{\left(\left(\frac{p+1}{p}\right)192\kappa^2e^{\frac{4}{\alpha}} + 6\alpha\right)^2 + 20\left(\left(\frac{p+1}{p}\right)192\kappa^2e^{\frac{4}{\alpha}} - \alpha^2\right)}}{2\left(\left(\frac{p+1}{p}\right)192\kappa^2e^{\frac{4}{\alpha}} - \alpha^2\right)}. \quad (50)$$

**Remark 2.** Note that the left hand side of (46) is independent of the time and is smaller than any condition over  $\eta_t$  derived to cancel out the effect of  $\|\mathbf{g}\|_2^2$  periodically and satisfying it for every  $\eta_t$  is a sufficient condition to have this property.

Note that due to the choice of  $\eta_t$ , it can cancel out the effect of  $B_t$  and we can rewrite the (43) as follows:

$$\mathbb{E}[F(\bar{\mathbf{x}}^{(t+1)}) - F^*] \leq \Delta_t \mathbb{E}[F(\bar{\mathbf{x}}^{(t)}) - F^*] + A_t \quad (51)$$

## B.6 Proof of Lemma 6

From Lemma 5, we have:

$$\zeta(t+1) \leq \Delta_t \zeta(t) + A_t \quad (52)$$

Define  $z_t \triangleq (t+a)^2$  similar to [33], we have

$$\Delta_t \frac{z_t}{\eta_t} = (1 - \mu\eta_t)\mu \frac{(t+a)^3}{4} = \frac{\mu(a+t-4)(a+t)^2}{4} \leq \mu \frac{(a+t-1)^3}{4} = \frac{z_{t-1}}{\eta_{t-1}} \quad (53)$$

Now by multiplying both sides of (54) with  $\frac{z_t}{\eta_t}$  we have:

$$\begin{aligned} \frac{z_t}{\eta_t} \zeta(t+1) &\leq \zeta(t) \Delta_t \frac{z_t}{\eta_t} + \frac{z_t}{\eta_t} A_t \\ &\stackrel{\textcircled{1}}{\leq} \zeta(t) \frac{z_{t-1}}{\eta_{t-1}} + \frac{z_t}{\eta_t} A_t, \end{aligned} \quad (54)$$

where ① follows from (53). Next iterating over (54) leads to the following bound:

$$\zeta(T) \frac{z_{T-1}}{\eta_{T-1}} \leq (1 - \mu\eta_0) \frac{z_0}{\eta_0} \zeta(0) + \sum_{k=0}^{T-1} \frac{z_k}{\eta_k} A_k$$



(55)

Final step in proof is to bound  $\sum_{k=0}^{T-1} \frac{z_k}{\eta_k} A_k$  as follows:

$$\begin{aligned}
\sum_{k=0}^{T-1} \frac{z_k}{\eta_k} A_k &= \frac{\mu}{4} \sum_{k=0}^{T-1} (k+a)^3 \left( \frac{L\eta_k^2 \sigma^2}{2pB} + \frac{\eta_k L^2}{p} \left( \sum_{k=t_c+1}^{k-1} \eta_k^2 \frac{(p+1)\sigma^2}{pB} \right) \right) \\
&\stackrel{\textcircled{1}}{\leq} \frac{\mu}{4} \sum_{k=0}^{T-1} (k+a)^3 \left( \frac{L\eta_k^2 \sigma^2}{2pB} + \frac{\eta_k L^2}{p} \eta_{\lfloor \frac{k}{\tau} \rfloor \tau}^2 (\tau-1) \frac{\sigma^2}{B} \left( \frac{p+1}{p} \right) \right) \\
&= \frac{L\sigma^2 \mu}{8pB} \sum_{k=0}^{T-1} (k+a)^3 \eta_k^2 + \frac{L^2 \sigma_b^2 (p+1)(\tau-1)\mu}{4p^2} \sum_{k=0}^{T-1} (k+a)^3 \eta_k \eta_{\lfloor \frac{k}{\tau} \rfloor \tau}^2, \quad (56)
\end{aligned}$$

① is due to fact that  $\eta_t$  is non-increasing.

Next we bound two terms in (56) as follows:

$$\begin{aligned}
\sum_{k=0}^{T-1} (k+a)^3 \eta_k^2 &= \sum_{k=0}^{T-1} (k+a)^3 \frac{16}{\mu^2 (k+a)^2} \\
&= \frac{16}{\mu^2} \sum_{k=0}^{T-1} (k+a) \\
&= \frac{16}{\mu^2} \left( \frac{T(T-1)}{2} + aT \right) \\
&\leq \frac{8T(T+2a)}{\mu^2}, \quad (57)
\end{aligned}$$

and similarly we have:

$$\begin{aligned}
\sum_{k=0}^{T-1} (k+a)^3 \eta_k \eta_{\lceil \frac{k}{\tau} \rceil \tau}^2 &= \frac{64}{\mu^3} \sum_{k=0}^{T-1} (k+a)^3 \frac{1}{k+a} \left( \frac{1}{\lfloor \frac{k}{\tau} \rfloor \tau + a} \right)^2 \\
&\stackrel{\textcircled{1}}{\leq} \frac{64}{\mu^3} \sum_{k=0}^{T-1} \left( \frac{k+a}{\lfloor \frac{k}{\tau} \rfloor \tau + a} \right)^2 \\
&\stackrel{\textcircled{2}}{\leq} \frac{256}{\mu^3} T, \quad (58)
\end{aligned}$$

where ① follows from  $\lfloor \frac{k}{\tau} \rfloor \tau + a \geq \lfloor k+a \rfloor$  and ② comes from the fact that  $\frac{n}{\lfloor n \rfloor} \leq 2$  for any integer  $n > 0$ .

Based on these inequalities we get:

$$\begin{aligned}
\sum_{k=0}^{T-1} \frac{z_k}{\eta_k} A_{k-1}(k) &\leq \frac{L\sigma^2 \mu}{8pB} \left( \frac{8T(T+2a)}{\mu^2} \right) + \frac{L^2 \sigma_b^2 (p+1)(\tau-1)\mu}{4p^2} \left( \frac{256}{\mu^3} T \right) \\
&= \frac{L\sigma^2 T(T+2a)}{pB\mu} + \frac{64L^2 \sigma^2 T(\tau-1)}{pB\mu^2} \\
&= \frac{\kappa \sigma^2 T(T+2a)}{pB} + \frac{64\kappa^2 \sigma^2 T(\tau-1)}{pB}, \quad (59)
\end{aligned}$$

Then, the upper bound becomes as follows:

$$\zeta(T) \frac{z_{T-1}}{\eta_{T-1}} = \mathbb{E}[F(\bar{\mathbf{x}}^{(t)}) - F^*] \frac{\mu(T+a)^3}{4}$$

$$\begin{aligned}
&\leq (1 - \mu\eta_0) \frac{z_{T-1}}{\eta_{T-1}} \zeta(0) + \sum_{k=0}^{T-1} \frac{z_k}{\eta_k} A_k \\
&\leq (1 - \mu\eta_0) \frac{z_0}{\eta_0} \zeta(0) + \frac{\kappa \frac{\sigma^2}{b} T(T+2a)}{pB} + \frac{64\kappa^2 \sigma^2 T(\tau-1)}{pB} \\
&\leq \frac{\mu a^3}{4} \mathbb{E}[F(\bar{\mathbf{x}}^{(0)}) - F^*] + \frac{\kappa \sigma^2 T(T+2a)}{pB} + \frac{64\kappa^2 \sigma^2 T(\tau-1)}{pB}, \tag{60}
\end{aligned}$$

Finally, from (60) we conclude:

$$\mathbb{E}[F(\bar{\mathbf{x}}^{(t)}) - F^*] \leq \frac{a^3}{(T+a)^3} \mathbb{E}[F(\bar{\mathbf{x}}^{(0)}) - F^*] + \frac{4\kappa \sigma^2 T(T+2a)}{\mu p B (T+a)^3} + \frac{256\kappa^2 \sigma^2 T(\tau-1)}{\mu p B (T+a)^3}, \tag{61}$$

## C Proof of Theorem 2

Theorem 2 can be seen as an extension of Theorem 1, and for the purpose of the proof and letting  $t_c = \lfloor \frac{t}{\tau_i} \rfloor \tau_i$  where  $T = \sum_{i=1}^E \tau_i$ , we only need following Lemmas:

**Lemma 7.** *Under Assumptions 1 to 3 we have:*

$$\mathbb{E} \sum_{j=1}^p \|\bar{\mathbf{x}}^{(t)} - \mathbf{x}_j^{(t)}\|^2 \leq 2\left(\frac{p+1}{p}\right) \left( [C_1 + \tau_i] \sum_{k=t_c}^{t-1} \eta_k^2 \sum_{j=1}^p \|\nabla F(\mathbf{x}_j^{(k)})\|^2 + \sum_{k=t_c+1}^{t-1} \eta_k^2 \frac{\sigma^2}{B} \right), \tag{62}$$

**Lemma 8.** *Under assumptions 1 to 3, if we choose the learning rate as  $\eta_t = \frac{4}{\mu(t+c)}$  inequality (18) reduces to*

$$\mathbb{E}[F(\bar{\mathbf{x}}^{(t+1)})] - F^* \leq \Delta_t \mathbb{E}[F(\bar{\mathbf{x}}^{(t)}) - F^*] + A_t, \tag{63}$$

for all iterations and  $c = \alpha \max_i \tau_i + 4$  and  $\frac{\alpha}{e^{\frac{1}{\alpha}}} < L \sqrt{\frac{192}{\mu}}$ .

Finally, for the rest of the proof we only need to reconsider the last term as follows:

$$\begin{aligned}
\sum_{k=0}^{T-1} (k+c)^3 \eta_k \eta_{(t_c)}^2 (\tau_{t_c} - 1) &= \sum_{i=1}^E (\tau_i - 1) \sum_{k=1}^{\tau_i} (k+c)^3 \frac{4}{\mu(k+c)} \left( \frac{4}{\mu(\lfloor \frac{k}{\tau_i} \rfloor \tau_i + c)} \right)^2 \\
&\leq \frac{64}{\mu^3} \sum_{i=1}^E (\tau_i - 1) \sum_{k=1}^{\tau_i} \left( \frac{k+c}{\lfloor k+c \rfloor} \right)^2 \\
&\leq \frac{256}{\mu^3} \sum_{i=1}^E (\tau_i - 1) \tau_i, \tag{64}
\end{aligned}$$

The rest of the proof is similar to the proof of Theorem 1.
